# Supplementary material
Source: publisher figshare collection journal article supplement (https://acs.figshare.com/ndownloader/files/30828975)
Supplement: Supplementary file 1 [file 30828975]

## Supporting Information

### **A Highly Responsive and Robust Micro/Nano-Textured Self-Powered Triboelectric Humidity Sensor**

*Mohammad Salauddin Rasel, Pukar Maharjan, Mohammad Toyabur Rahman, Md Salauddin, S M Sohel Rana, Sanghyun Lee, and Jae Yeong Park\**

Advanced Sensor and Energy Research (ASER) Laboratory, Department of Electronic Engineering, Kwangwoon University, 20 Kwangwoon-ro, Nowon-gu, Seoul 01897, Republic of Korea

\*Corresponding author. E-mail: [jaepark@kw.ac.kr](mailto:jaepark@kw.ac.kr) (Jae Yeong Park)

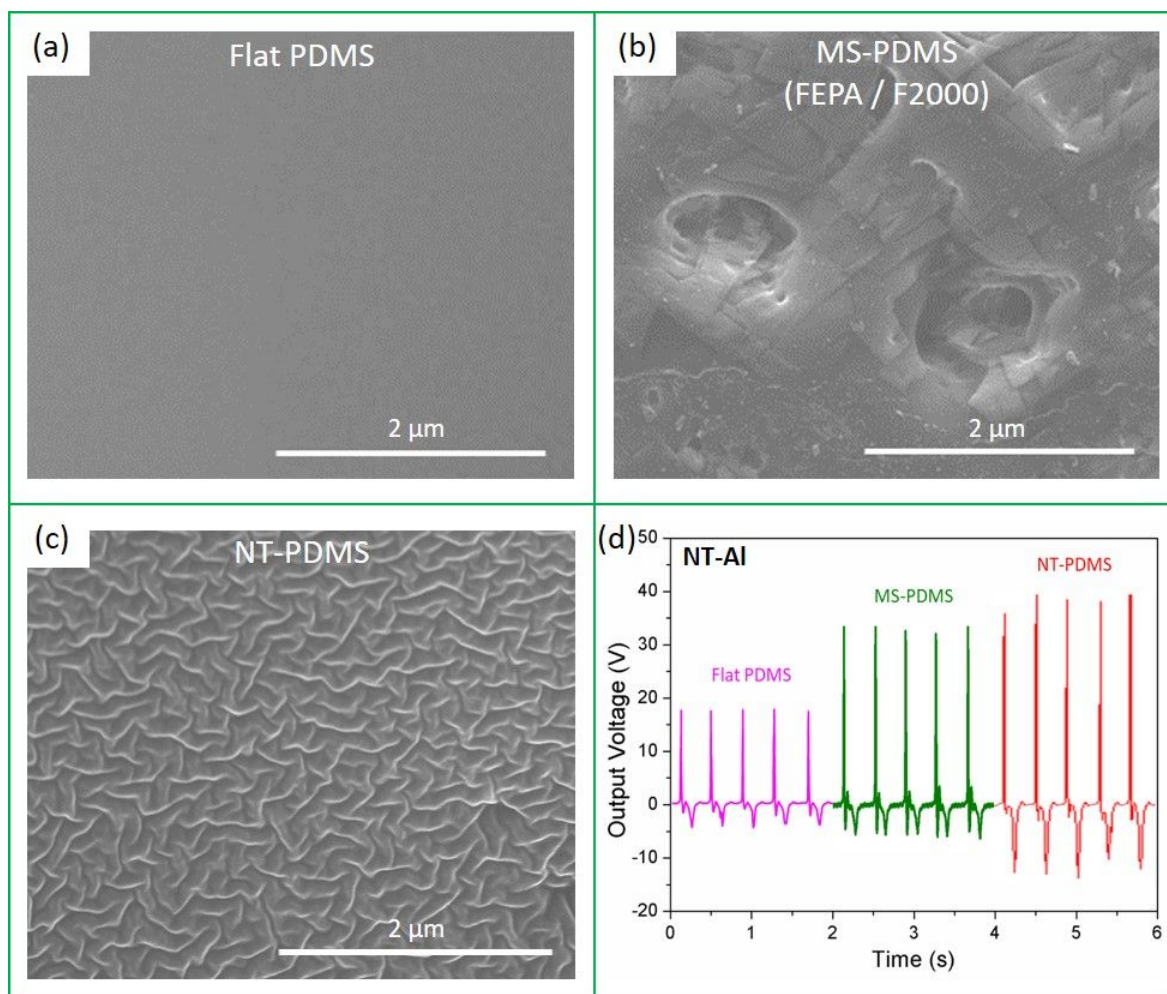

**Figure S1** (a–c) The scanning electron microscopy (SEM) images of the untreated flat PDMS surface, sandpaper template replicated microstructured PDMS (MS-PDMS) surface, and oxygen plasma etched nano-textured PDMS (NT-PDMS) surface. (d) The measured open-circuit output voltage profiles of the as-fabricated TEHS incorporating as-fabricated nano-textured aluminum (NT-Al) film and one of the three different PDMS films (10 %RH; Room temperature).

**Table S1.** R-Square values for Figure 6(d).

| Equation                | $y = a + b \cdot x$         |                           |                           |
|-------------------------|-----------------------------|---------------------------|---------------------------|
| Plot                    | Output Voltage<br>at -10°C  | Output Voltage<br>at 10°C | Output Voltage<br>at 30°C |
| Weight                  | Instrumental ( $=1/e_i^2$ ) |                           |                           |
| Intercept               | $130.12342 \pm 0.20694$     | $126.88889 \pm 0.35019$   | $122.30045 \pm 0.49158$   |
| Slope                   | $-0.22655 \pm 0.00411$      | $-0.22754 \pm 0.00577$    | $-0.21439 \pm 0.00859$    |
| Residual Sum of Squares | 1.08373                     | 2.30623                   | 7.10675                   |
| Pearson's r             | -0.99885                    | -0.99776                  | -0.99442                  |
| R-Square (COD)          | 0.99771                     | 0.99553                   | 0.98888                   |
| <b>Adj. R-Square</b>    | <b>0.99738</b>              | <b>0.99489</b>            | <b>0.98729</b>            |
